# Supplementary material
Source: Springer Nature journal article supplement (https://www.springermedizin.de/resource/supplementary/12891_2014_2206_MOESM6_ESM.pdf/9509676)

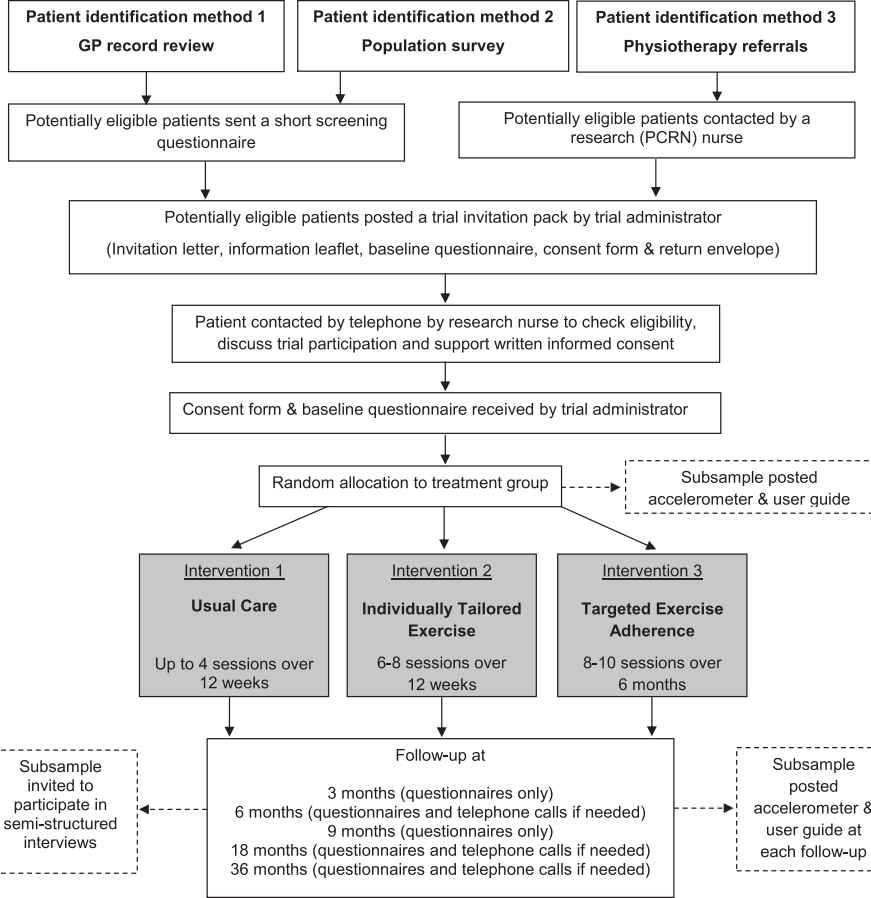

Supplement: MOESM6 [file 9509676]
